# Supplementary material for: Effects of Protein yogurts vs. Whey protein on body composition, strength, and gut microbiome changes in untrained older adults during 8 weeks of supervised strength training: a randomized trial.
Source: Research Square preprint supplement (doi:10.21203/rs.3.rs-8098210/v1), 2026-01-13
Supplement: Supplementary file 1 [file 05c155bfb049e0dde72f2d58.docx]

| Variable | **Whey Protein**  **WP (30g)** | **Protein Yogurt**  **(2 servings)**  **PY (280g)** |
| --- | --- | --- |
| Energy (kcal) | 110 | 176 |
| Protein (g) | 25 | 24.6 |
| Total fat (g) | 0 | 1.4 |
| Saturated fat (g) | 0 | 0.8 |
| Monounsaturated fat (g) | 0 | 0.2 |
| Polyunsaturated fat (g) | 0 | 0 |
| Trans fat (g) | 0 | 0 |
| Cholesterol (mg) | 10 | 11 |
| Carbohydrates (g) | 1 | 16.6 |
| Total sugar (g) | <1 | 16.6 |
| Added sugars (g) | 0 | 0 |
| Sodium (mg) | 100 | 182 |
| Calcium (mg) | 90 | 214.2 |
| Potassium (mg) | 90 | ND |
| Sucralose (mg) | ND | 44.2 |
| Stevia (mg) | ND | 5.6 |

**Table 1**. Nutritional labeling information of supplements; **Whey Protein Isolate (WP) and Protein Yogurt (PY).** ND: Not declared
