# Supplementary material for: Effects of Protein yogurts vs. Whey protein on body composition, strength, and gut microbiome changes in untrained older adults during 8 weeks of supervised strength training: a randomized trial.
Source: Research Square preprint supplement (doi:10.21203/rs.3.rs-8098210/v1), 2026-01-13
Supplement: Supplementary file 2 [file 3fa48f0983523363768ccb32.docx]

**o**

**Supplementary Figure 2. Shannon Entropy and Principal Component Analysis of the gut microbiota.** A) Shannon entropy values before (PRE) and after (POST) the physical activity intervention. B) Shannon Entropy values before (PRE) and after (POST) the physical activity intervention, separated by supplementation type: Whey Protein (WP) and Protein Yogurt (PY). C) Principal Component Analysis (PCA) plot of the microbiota composition, showing the clustering of samples by group: PY_POST (red), PY_PRE (blue), WP_POST (green), and WP_PRE (purple). Each point represents an individual sample, and the ellipses indicate the 95% confidence intervals for each group. For statistical analysis, a Wilcoxon test was performed between PRE and POST pairs for each protein supplement. * p < 0.05, NS indicates not significant.
