# Supplementary material for: Effects of Protein yogurts vs. Whey protein on body composition, strength, and gut microbiome changes in untrained older adults during 8 weeks of supervised strength training: a randomized trial.
Source: Research Square preprint supplement (doi:10.21203/rs.3.rs-8098210/v1), 2026-01-13
Supplement: Supplementary file 3 [file 5f09afe57ff3c5ca0dabf802.docx]

**Supplementary Figure 1. Serum lipid, renal and hepatic markers differences. Lipid Panel;** **A)** Total Cholesterol (mg/dL). **B)** HDL Cholesterol (mg/dL). **C)** Triglycerides (mg/dL). **Hepatic Panel:** **D)** Aspartate Aminotransferase (GOT) (UI/L). **E)** Glutamate Pyruvate Transaminase (GPT) (UI/L). **F)** Gamma Glutamyl Transferase (GGT) (UI/L). **Renal Panel;** **G)** Blood Urea Nitrogen (BUN) (mg/dL). **H)** Uric Acid (mg/dL) and **I)** Creatinine (mg/dL). Data are presented as the mean ± standard deviation (SD) and express in % difference (post-pre Δ**)**. Mann-Whytney test, * p < 0.05, NS indicates not significant difference
